# Supplementary material for: Wild ungulates as sentinels of flaviviruses and tick-borne zoonotic pathogen circulation: an Italian perspective
Source: PubMed Central journal article supplement (PMC10500747; doi:10.1186/s12917-023-03717-x), 2023-09-14
Supplement: 12917_2023_3717_MOESM3_ESM.pdf [file 12917_2023_3717_MOESM3_ESM.pdf]

**Additional file 1.** Biomolecular methods used for TBPs screening and sequencing, detailed information about bacterial/viral species, PCR method used, target gene, primers, nucleotide sequence and probes, amplicon size and bibliography references.

| Species                        | PCR method                    | Target gene | Primer              | Nucleotide sequence 5' → 3'    | Amplicon      | Reference |
|--------------------------------|-------------------------------|-------------|---------------------|--------------------------------|---------------|-----------|
| <i>Ehrlichia</i> spp.          | PCR<br>groEL                  |             | groEL643f           | ACTGATGGTATGCARTTTGAYCG        | 600-bp<br>(1) |           |
|                                |                               |             | groEL1236r          | TCTTTRCGTTTCYTTMACYTCAACTTC    |               |           |
| <i>Neoehrlichia mikurensis</i> | HRM Real-time PCR<br>16S rRNA |             | F                   | GGGGATGATGTCAARTCAGCAY         | 257-bp<br>(2) |           |
|                                |                               |             | R                   | CACCAGCTTCGAGTTAAGCCAAT        |               |           |
|                                | PCR<br>16S rRNA               |             | fD1                 | AGAGTTTGATCCTGGCTCAG           | 760-bp<br>(3) |           |
|                                |                               |             | Ehr16SR             | TAGCACTCATCGTTTACAGC           |               |           |
| <i>Borrelia b.</i> s.l.        | Real-time PCR<br>23S rRNA     |             | Bb23Sf              | CGAGTCTTAAAAGGGCGATTTAGT       | 75-bp<br>(4)  |           |
|                                |                               |             | Bb23Sr              | GCTTCAGCCTGGCCATAAATAG         |               |           |
|                                |                               |             | Bb23Sp-FAM          | AGATGTGGTAGACCCGAAGCCGAGTG     |               |           |
|                                | PCR<br>groEL                  |             | GF                  | TACGATTTCTTATGTTGAGGG          | 310-bp<br>(5) |           |
|                                |                               |             | GR                  | CATTGCTTTTCGTCTATCACC          |               |           |
| <i>Rickettsia</i> spp.         | Real-time PCR<br>gltA         |             | RKND03f             | GTGAATGAAAGATTACACTATTTAT      | -             | (6)       |
|                                |                               |             | RKND03r             | GTATCTTAGCAATCATTCTAATAGC      |               |           |
|                                |                               |             | RKND03-FAM          | CTATTATGCTTGCGGCTGTCCGGTTC     |               |           |
|                                | Nested PCR<br>gltA-outer      |             | RpCS.877p           | GGGGCCCTGCTCACGGCGG            | 381-bp<br>(7) |           |
|                                |                               |             | RpCS.1258n          | ATTGCAAAAAGTACAGTGAACA         |               |           |
|                                | Nested PCR<br>gltA-inner      |             | RpCS.896p           | GGCTAATGAAGCAGTGATAA           | 337-bp<br>(7) |           |
| RpCS.1233n                     |                               |             | GCGACGGTATACCCATAGC |                                |               |           |
| <i>Coxiella</i> spp.           | Real-time PCR<br>icd          |             | icd-439f            | CGTTATTTTACGGGTGTGCCA          | 76-bp<br>(8)  |           |
|                                |                               |             | icd-514r            | CAGAATTTTCGCGGAAAATCA          |               |           |
|                                |                               |             | icd-464-FAM         | CATATTCACCTTTTCAGGCGTTTTGACCGT |               |           |
| TBEV                           | Real-time PCR                 |             | TBE-f               | TGGGCGGTTCTTGTTCTCC            | -             | (9)       |
|                                |                               |             | TBE-r               | TCACACATCACCTCCTTGTCAGA        |               |           |
|                                |                               |             | TBE-FAM             | CTGAGCCACCATCACCCAGACACAG      |               |           |

## References

1. Guillemi EC, Tomassone L, Farber MD. Tick-borne Rickettsiales: Molecular tools for the study of an emergent group of pathogens. *J Microbiol Methods*. 2015;119:87–97.
2. Krücken J, Schreiber C, Maaz D, Kohn M, Demeler J, Beck S, et al. A novel high-resolution melt PCR assay discriminates *Anaplasma phagocytophilum* and “*Candidatus Neoehrlichia mikurensis*.” *J Clin Microbiol*. 2013;51(6):1958–61.
3. Goodman JL, Nelson C, Vitale B, Madigan JE, Dumler JS, Kurtti TJ, et al. Direct Cultivation of the Causative Agent of Human Granulocytic Ehrlichiosis. *N Engl J Med*. 1996;334(4):209–15.
4. Courtney JW, Kostelnik LM, Zeidner NS, Massung RF. Multiplex real-time PCR for detection of *Anaplasma phagocytophilum* and *Borrelia burgdorferi*. *J Clin Microbiol*. 2004;42(7):3164–8.
5. Lee SH, Lee JH, Park HS, Jang WJ, Koh SE, Yang YM, et al. Differentiation of *Borrelia burgdorferi* sensu lato through groEL gene analysis. *FEMS Microbiol Lett*. 2003;222(1):51–7.
6. Rolain JM, Bitam I, Buffet S, Marié JL, Bourry O, Portelli-Clerc C, et al. Presence or absence of plasmid in *Rickettsia felis* depending on the source of fleas. *Eur Soc Clin Microbiol Infect Dis*. 2009;15 Suppl 2:296–7.
7. Choi YJ, Jang WJ, Kim JH, Ryu JS, Lee SH, Park KH, et al. Spotted fever group and typhus group rickettsioses in humans, South Korea. *Emerg Infect Dis*. 2005;11(2):237–44.
8. Klee SR, Tyczka J, Ellerbrok H, Franz T, Linke S, Baljer G, et al. Highly sensitive real-time PCR for specific detection and quantification of *Coxiella burnetii*. *BMC Microbiol*. 2006;6:1–8.
9. Schwaiger M, Cassinotti P. Development of a quantitative real-time RT-PCR assay with internal control for the laboratory detection of tick borne encephalitis virus (TBEV) RNA. *J Clin Virol*. 2003;27(2):136–45.
